# Supplementary material
Source: publisher figshare collection journal article supplement (https://springernature.figshare.com/ndownloader/files/16781252)
Supplement: Supplementary file [file 16781252]

## FMEA SCORING TOOL

*Risk Priority Number (RPN) is calculated by multiplying **Severity** score by **Probability** score by the **Detection** score. Issues are considered significant priorities if **RPN** is between 32-64 on scale of 1-64.*

|                                  | 4                                                                                                                                                                                                                                                                                                                                                                                                                       | 3                                                                                                                                                                                                                                                                                                                                                                                                                                                                                                                                              | 2                                                                                                                                                                                                                                                                                                                                                                                                                                                                                 | 1                                                                                                                                                                                                                                                                                                                                                                                                                                                           |
|----------------------------------|-------------------------------------------------------------------------------------------------------------------------------------------------------------------------------------------------------------------------------------------------------------------------------------------------------------------------------------------------------------------------------------------------------------------------|------------------------------------------------------------------------------------------------------------------------------------------------------------------------------------------------------------------------------------------------------------------------------------------------------------------------------------------------------------------------------------------------------------------------------------------------------------------------------------------------------------------------------------------------|-----------------------------------------------------------------------------------------------------------------------------------------------------------------------------------------------------------------------------------------------------------------------------------------------------------------------------------------------------------------------------------------------------------------------------------------------------------------------------------|-------------------------------------------------------------------------------------------------------------------------------------------------------------------------------------------------------------------------------------------------------------------------------------------------------------------------------------------------------------------------------------------------------------------------------------------------------------|
| <b>SEVERITY</b>                  | <b>CATASTROPHIC</b><br><i>Failure could cause death, injury</i><br><u>Patient Outcome:</u><br>- Death or major permanent loss of function (sensory, motor, physiologic, or intellectual)<br><u>Visitor Outcome:</u><br>- A death; or hospitalization of ≥3<br><u>Staff Outcome:</u><br>- A death; or hospitalization of ≥3<br><u>Equipment/Facility damage:</u><br>- Fire beyond incipient stage; or damages ≥\$250,000 | <b>MAJOR</b><br><i>Failure could cause high degree customer dissatisfaction</i><br><u>Patient Outcome:</u><br>- Permanent lessening of bodily functioning (sensory, motor, physiologic, or intellectual); or<br>- Increased length of stay or increased level of care for ≥3 patients<br><u>Visitor Outcome:</u><br>- Hospitalization of 1-2 visitors<br><u>Staff Outcome:</u><br>- Hospitalization of 1-2 staff; or ≥3 staff experiencing lost time, or restricted duty<br><u>Equipment/Facility damage:</u><br>- Damages \$100,000-\$250,000 | <b>MODERATE</b><br><i>Failure can be overcome, but there is minor performance loss</i><br><u>Patient Outcome:</u><br>- Increased length of stay or increased level of care for 1-2 patients<br><u>Visitor Outcome:</u><br>- Evaluation, treatment of 1-2 visitors<br><u>Staff Outcome:</u><br>- Medical expenses, lost time, or restricted duty for 1-2 staff<br><u>Equipment/Facility damage:</u><br>- Damages \$10,000-\$100,000; or<br>- Fire, at/smaller than incipient stage | <b>MINOR</b><br><i>Failure not noticeable to customer, no effect on delivery of service</i><br><u>Patient Outcome:</u><br>- No injury, nor increased length of stay, nor increased level of care<br><u>Visitor Outcome:</u><br>- Evaluated, but no treatment<br><u>Staff Outcome:</u><br>- First aid only, no lost time, or restricted duty<br><u>Equipment/Facility damage:</u><br>- Damages <\$10,000; or loss of utility without adverse patient outcome |
| <b>PROBABILITY OR OCCURRENCE</b> | <b>FREQUENT</b><br><i>Likely to occur immediately or within a short period (may happen several times in 1 year)</i>                                                                                                                                                                                                                                                                                                     | <b>OCCASIONAL</b><br><i>Probably will occur (may happen several times in 1 to 2 years)</i>                                                                                                                                                                                                                                                                                                                                                                                                                                                     | <b>UNCOMMON</b><br><i>Possible to occur (may happen sometime in 2 to 5 years)</i>                                                                                                                                                                                                                                                                                                                                                                                                 | <b>REMOTE</b><br><i>Unlikely to occur (may happen sometime in 5 to 30 years)</i>                                                                                                                                                                                                                                                                                                                                                                            |
| <b>DETECTION</b>                 | <b>ALMOST IMPOSSIBLE</b><br><i>No known controls are available to detect failure mode</i>                                                                                                                                                                                                                                                                                                                               | <b>REMOTE</b><br><i>Remote likelihood that current controls will detect failure mode</i>                                                                                                                                                                                                                                                                                                                                                                                                                                                       | <b>MODERATE</b><br><i>Moderate likelihood that current controls will detect failure mode</i>                                                                                                                                                                                                                                                                                                                                                                                      | <b>HIGH</b><br><i>High likelihood that current controls will detect failure mode. Reliable detection controls are known with similar processes</i>                                                                                                                                                                                                                                                                                                          |

| Threat Detected                                                  | LST Category                                                                        | Potential Failure Effect                                                          | Action Recommended by Scoring Team                                                                | Severity | Occurrence | Detection | RPN | 30-day Post Simulation Action Taken                                                        |
|------------------------------------------------------------------|-------------------------------------------------------------------------------------|-----------------------------------------------------------------------------------|---------------------------------------------------------------------------------------------------|----------|------------|-----------|-----|--------------------------------------------------------------------------------------------|
| What is the process step, change or feature under investigation? | [Resource Issue, Process/Systems Issue, Facility Issue, Clinical Performance issue] | What is the impact on the customer if this failure is not prevented or corrected? | What are the recommended actions for reducing the occurrence of the cause or improving detection? |          |            |           |     | What action will be taken in relation to this finding and what will the follow-up plan be? |
|                                                                  |                                                                                     |                                                                                   |                                                                                                   |          |            |           |     |                                                                                            |

| Threat Detected | LST Category | Potential Failure Effect | Action Recommended by Scoring Team | Severity | Occurrence | Detection | RPN | 30-day Post Simulation Action Taken |
|-----------------|--------------|--------------------------|------------------------------------|----------|------------|-----------|-----|-------------------------------------|
|                 |              |                          |                                    |          |            |           |     |                                     |
|                 |              |                          |                                    |          |            |           |     |                                     |
|                 |              |                          |                                    |          |            |           |     |                                     |
|                 |              |                          | -                                  |          |            |           |     |                                     |
|                 |              |                          |                                    |          |            |           |     |                                     |
|                 |              |                          |                                    |          |            |           |     |                                     |
|                 |              |                          |                                    |          |            |           |     |                                     |

Additional File 1: Appendix D. FMEA Scoring Rubric and Reporting Template
